# Supplementary material
Source: PubMed Central journal article supplement (PMC7736558)
Supplement: NIHMS1646626-supplement-Supp__Data.pdf [file NIHMS1646626-supplement-Supp__Data.pdf]

Suppl Fig. S1

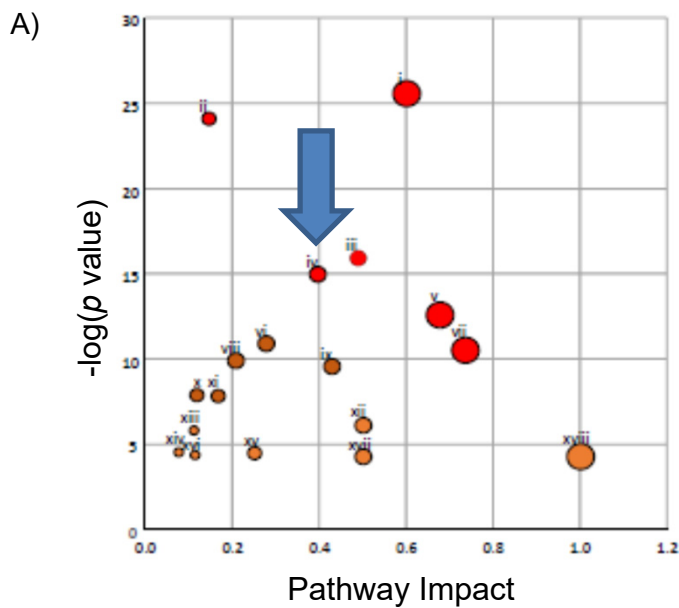

B)

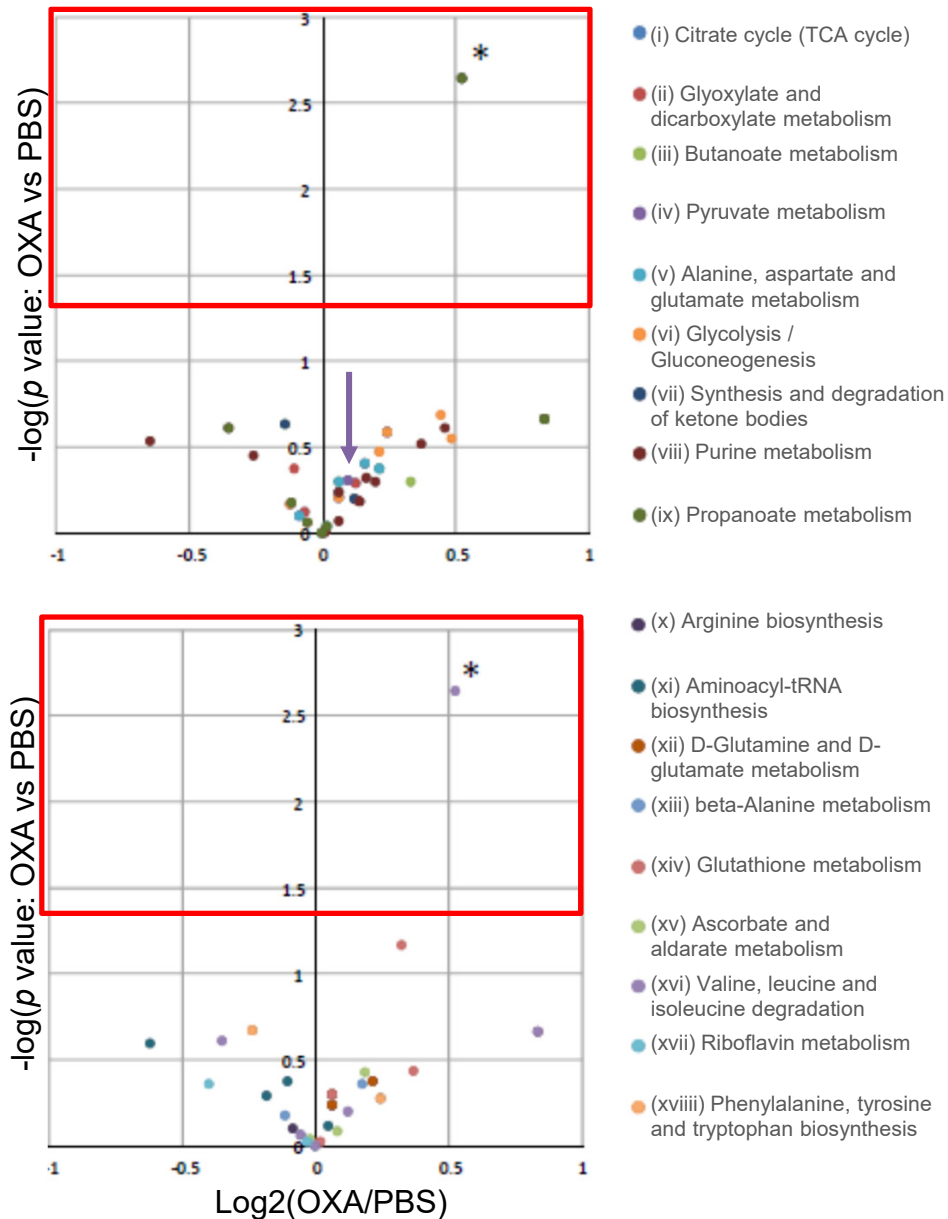

1 **Supplementary Figure S1: Pathway analysis of metabolites extracted from pulverized long bone of oxamate-**  
2 **and PBS-treated mice.** A) Metaboanalyst pathway analysis of metabolites was used to determine which metabolic  
3 pathways have significant detection to warrant further discussion. The top 18 most covered pathways are shown and  
4 listed as roman numerals from i-xviii (1-18) with i having the greatest metabolite coverage and xviii having the least.  
5 (Arrow indicated pyruvate metabolism (iv); B) Volcano plot of metabolites from OXA- and PBS-treated mice from top  
6 nine (i-ix, above) and bottom nine (x- xviii, below). Data on log base 10 scale has significance for  $p$ -value  $< 0.05$  at  $>1.3$   
7 on the y-axis, and significant fold change  $> 3$  at  $> 0.43$  and  $< -0.43$  on the x-axis. \*,  $p < 0.05$  vs PBS-treated controls ( $t$ -  
8 test). Arrow marks location of pyruvate.  
9  
10  
11  
12  
13  
14  
15  
16  
17  
18  
19  
20  
21  
22  
23  
24  
25  
26  
27  
28  
29  
30  
31  
32  
33  
34  
35  
36  
37  
38  
39  
40  
41  
42  
43  
44  
45  
46  
47  
48  
49  
50  
51  
52  
53  
54  
55  
56  
57  
58  
59  
60

Suupl Fig. S2

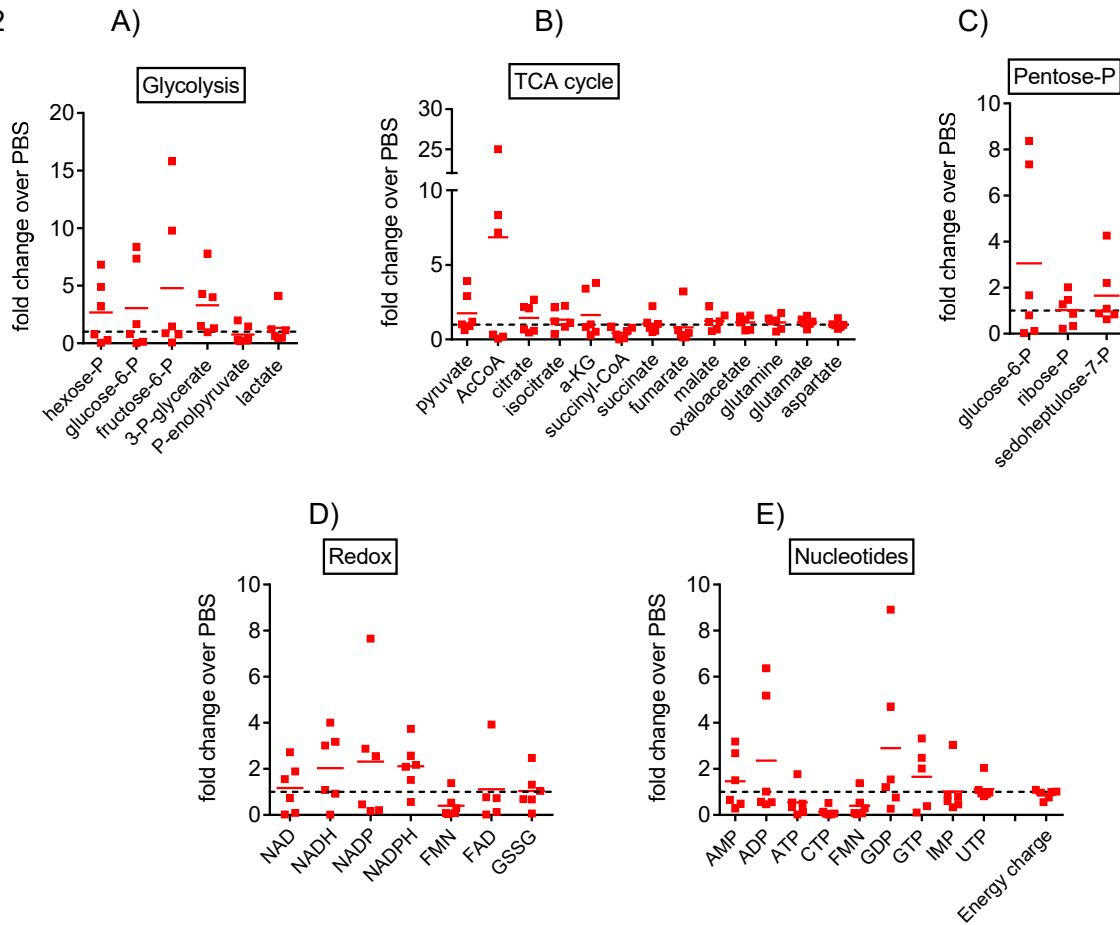

**Supplementary Figure S2: Metabolite content following treatment with oxamate.** Levels of metabolites extracted from long bone of mice treated with OXA or PBS are compared for central metabolic pathways revealing large but non-significant increases in glycolysis (A), TCA cycle (B), Pentose-phosphate pathway (C). Key Redox metabolites (D), and Nucleotides (E) were also increased after OXA treatment but did not reach significance. Data are expressed as fold change over the control (PBS-treated) levels marked with dotted lines. Plots show actual data points and calculated means. Significance was determined by unpaired *t*-test.

Table S1: Levels of metabolites assigned to specific pathways using Metaboanalyst in oxamate- vs PBS-treated mouse long bones

|                                                         | Mean PBS   | Mean OXA  | SD PBS   | SD OXA   | p Value<br>PBS vs OXA | FoldChange<br>PBS vs OXA | -Log(p Value)<br>PBS vs OXA | Log(FC)<br>PBS vs OXA |
|---------------------------------------------------------|------------|-----------|----------|----------|-----------------------|--------------------------|-----------------------------|-----------------------|
| <b>(i) Citrate cycle (TCA cycle):</b>                   |            |           |          |          |                       |                          |                             |                       |
| alpha-Ketoglutarate_(a-KG)                              | 26217.7586 | 43007.129 | 18629.23 | 40418.29 | 0.41689392            | 1.640381599              | 0.379974434                 | 0.214944889           |
| Succinyl-CoA                                            | 116.168071 | 51.40781  | 118.6868 | 41.92338 | 0.24033978            | 0.442529597              | 0.619174346                 | -0.354057678          |
| Succinate                                               | 331334.172 | 345653.73 | 145225.6 | 209980.9 | 0.90058147            | 1.043217873              | 0.045476994                 | 0.018375019           |
| Isocitrate                                              | 10519.6499 | 13984.723 | 8955.897 | 7769.424 | 0.50880749            | 1.32939057               | 0.293446503                 | 0.123652594           |
| Oxaloacetate                                            | 18426.6949 | 21269.656 | 9829.662 | 8118.1   | 0.61134956            | 1.154284922              | 0.213710393                 | 0.062313022           |
| Malate                                                  | 553127.034 | 688896.35 | 270659.4 | 339397.1 | 0.48887541            | 1.245457742              | 0.310801809                 | 0.095328997           |
| Aconitate                                               | 188415.706 | 162498.24 | 81495.33 | 154443   | 0.7443929             | 0.86244532               | 0.128197776                 | -0.06426843           |
| Citrate                                                 | 7949.98436 | 11510.718 | 4636.545 | 7726.802 | 0.39174292            | 1.447891893              | 0.406998844                 | 0.160736136           |
| Pyruvate                                                | 31420.2022 | 55284.016 | 12036.37 | 41950.97 | 0.25317457            | 1.759505405              | 0.596579913                 | 0.245390605           |
| Fumarate                                                | 40372.5888 | 33057.552 | 31940.29 | 48327.33 | 0.77935033            | 0.818811792              | 0.108267275                 | -0.086815911          |
| Acetyl-CoA                                              | 172.896092 | 1185.2564 | 125.2373 | 1667.867 | 0.2125213             | 6.855310625              | 0.672597539                 | 0.836027138           |
| Phosphoenolpyruvate                                     | 1740.17645 | 1318.5497 | 1776.559 | 1337.978 | 0.66355503            | 0.757710361              | 0.178123057                 | -0.120496774          |
| <b>(ii) Glyoxylate and dicarboxylate metabolism:</b>    |            |           |          |          |                       |                          |                             |                       |
| Aconitate                                               | 188415.706 | 162498.24 | 81495.33 | 154443   | 0.7443929             | 0.86244532               | 0.128197776                 | -0.06426843           |
| Citrate                                                 | 7949.98436 | 11510.718 | 4636.545 | 7726.802 | 0.39174292            | 1.447891893              | 0.406998844                 | 0.160736136           |
| Malonyl-CoA                                             | 513.939349 | 391.77518 | 419.2507 | 460.1548 | 0.65920326            | 0.762298481              | 0.180980657                 | -0.117874946          |
| Methylmalonyl-CoA                                       | 3524.80607 | 3508.0416 | 3041.222 | 2588.283 | 0.9923229             | 0.995243871              | 0.003346984                 | -0.002070488          |
| Propanoyl-CoA                                           | 85.9984913 | 75.723249 | 78.23899 | 106.1157 | 0.86182358            | 0.880518336              | 0.064581626                 | -0.055261596          |
| Serine                                                  | 40596.6326 | 31764.305 | 22566.05 | 10833.07 | 0.41510451            | 0.782436934              | 0.381842546                 | -0.106550657          |
| Glutamate                                               | 359805.802 | 416065.25 | 151673.5 | 111283.3 | 0.49544774            | 1.156360586              | 0.30500215                  | 0.063093281           |
| Isocitrate                                              | 10519.6499 | 13984.723 | 8955.897 | 7769.424 | 0.50880749            | 1.32939057               | 0.293446503                 | 0.123652594           |
| Pyruvate                                                | 31420.2022 | 55284.016 | 12036.37 | 41950.97 | 0.25317457            | 1.759505405              | 0.596579913                 | 0.245390605           |
| Oxaloacetate                                            | 18426.6949 | 21269.656 | 9829.662 | 8118.1   | 0.61134956            | 1.154284922              | 0.213710393                 | 0.062313022           |
| Acetoacetyl-CoA                                         | 57.9540688 | 194.53479 | 51.26006 | 55.30617 | 0.00226476            | 3.356706408              | 2.644978152                 | 0.525913358           |
| Succinyl-CoA                                            | 116.168071 | 51.40781  | 118.6868 | 41.92338 | 0.24033978            | 0.442529597              | 0.619174346                 | -0.354057678          |
| Glutamine                                               | 167078.921 | 193131.89 | 72189.35 | 75571.31 | 0.57567025            | 1.155932107              | 0.239826216                 | 0.062932327           |
| <b>(iii) Butanoate metabolism:</b>                      |            |           |          |          |                       |                          |                             |                       |
| 3-Hydroxybutyrate                                       | 52478.5453 | 38100.943 | 17519.82 | 19244.33 | 0.2313414             | 0.726028956              | 0.63574664                  | -0.139046058          |
| Acetoacetate                                            | 35661.8554 | 46962.449 | 24244.05 | 43529.17 | 0.61905889            | 1.316881829              | 0.208268036                 | 0.119546805           |
| Acetyl-CoA                                              | 172.896092 | 1185.2564 | 125.2373 | 1667.867 | 0.2125213             | 6.855310625              | 0.672597539                 | 0.836027138           |
| Acetoacetyl-CoA                                         | 57.9540688 | 194.53479 | 51.26006 | 55.30617 | 0.00226476            | 3.356706408              | 2.644978152                 | 0.525913358           |
| Glutamate                                               | 359805.802 | 416065.25 | 151673.5 | 111283.3 | 0.49544774            | 1.156360586              | 0.30500215                  | 0.063093281           |
| Butyryl-CoA                                             | 132.538298 | 285.82225 | 70.18592 | 474.2739 | 0.49574709            | 2.156525717              | 0.304739825                 | 0.333754642           |
| alpha-Ketoglutarate_(a-KG)                              | 26217.7586 | 43007.129 | 18629.23 | 40418.29 | 0.41689392            | 1.640381599              | 0.379974434                 | 0.214944889           |
| Succinate                                               | 331334.172 | 345653.73 | 145225.6 | 209980.9 | 0.90058147            | 1.043217873              | 0.045476994                 | 0.018375019           |
| <b>(iv) Pyruvate metabolism:</b>                        |            |           |          |          |                       |                          |                             |                       |
| Oxaloacetate                                            | 18426.6949 | 21269.656 | 9829.662 | 8118.1   | 0.61134956            | 1.154284922              | 0.213710393                 | 0.062313022           |
| Phosphoenolpyruvate                                     | 1740.17645 | 1318.5497 | 1776.559 | 1337.978 | 0.66355503            | 0.757710361              | 0.178123057                 | -0.120496774          |
| Pyruvate                                                | 31420.2022 | 55284.016 | 12036.37 | 41950.97 | 0.25317457            | 1.759505405              | 0.596579913                 | 0.245390605           |
| Malate                                                  | 553127.034 | 688896.35 | 270659.4 | 339397.1 | 0.48887541            | 1.245457742              | 0.310801809                 | 0.095328997           |
| Lactate                                                 | 3867286.31 | 5192042.7 | 2664038  | 5409687  | 0.63141026            | 1.342554519              | 0.199688363                 | 0.127931931           |
| Acetyl-CoA                                              | 172.896092 | 1185.2564 | 125.2373 | 1667.867 | 0.2125213             | 6.855310625              | 0.672597539                 | 0.836027138           |
| Acetoacetyl-CoA                                         | 57.9540688 | 194.53479 | 51.26006 | 55.30617 | 0.00226476            | 3.356706408              | 2.644978152                 | 0.525913358           |
| Malonyl-CoA                                             | 513.939349 | 391.77518 | 419.2507 | 460.1548 | 0.65920326            | 0.762298481              | 0.180980657                 | -0.117874946          |
| Fumarate                                                | 40372.5888 | 33057.552 | 31940.29 | 48327.33 | 0.77935033            | 0.818811792              | 0.108267275                 | -0.086815911          |
| <b>(v) Alanine, aspartate and glutamate metabolism:</b> |            |           |          |          |                       |                          |                             |                       |
| Aspartate                                               | 256854.861 | 254868.66 | 171377.9 | 63477.25 | 0.97941746            | 0.992267227              | 0.009032156                 | -0.003371352          |
| Glutamate                                               | 359805.802 | 416065.25 | 151673.5 | 111283.3 | 0.49544774            | 1.156360586              | 0.30500215                  | 0.063093281           |
| Glutamine                                               | 167078.921 | 193131.89 | 72189.35 | 75571.31 | 0.57567025            | 1.155932107              | 0.239826216                 | 0.062932327           |
| Citrate                                                 | 7949.98436 | 11510.718 | 4636.545 | 7726.802 | 0.39174292            | 1.447891893              | 0.406998844                 | 0.160736136           |
| Oxaloacetate                                            | 18426.6949 | 21269.656 | 9829.662 | 8118.1   | 0.61134956            | 1.154284922              | 0.213710393                 | 0.062313022           |
| Fumarate                                                | 40372.5888 | 33057.552 | 31940.29 | 48327.33 | 0.77935033            | 0.818811792              | 0.108267275                 | -0.086815911          |
| Pyruvate                                                | 31420.2022 | 55284.016 | 12036.37 | 41950.97 | 0.25317457            | 1.759505405              | 0.596579913                 | 0.245390605           |
| Succinate                                               | 331334.172 | 345653.73 | 145225.6 | 209980.9 | 0.90058147            | 1.043217873              | 0.045476994                 | 0.018375019           |
| alpha-Ketoglutarate_(a-KG)                              | 26217.7586 | 43007.129 | 18629.23 | 40418.29 | 0.41689392            | 1.640381599              | 0.379974434                 | 0.214944889           |
| <b>(vi) Glycolysis / Gluconeogenesis:</b>               |            |           |          |          |                       |                          |                             |                       |
| Pyruvate                                                | 31420.2022 | 55284.016 | 12036.37 | 41950.97 | 0.25317457            | 1.759505405              | 0.596579913                 | 0.245390605           |
| Acetyl-CoA                                              | 172.896092 | 1185.2564 | 125.2373 | 1667.867 | 0.2125213             | 6.855310625              | 0.672597539                 | 0.836027138           |
| Lactate                                                 | 3867286.31 | 5192042.7 | 2664038  | 5409687  | 0.63141026            | 1.342554519              | 0.199688363                 | 0.127931931           |

|    |                                                                 |            |           |          |          |            |             |             |              |
|----|-----------------------------------------------------------------|------------|-----------|----------|----------|------------|-------------|-------------|--------------|
| 1  |                                                                 |            |           |          |          |            |             |             |              |
| 2  | Phosphoenolpyruvate                                             | 1740.17645 | 1318.5497 | 1776.559 | 1337.978 | 0.66355503 | 0.757710361 | 0.178123057 | -0.120496774 |
| 3  | Glucose-6-Phosphate                                             | 14417.1558 | 44081.962 | 19230.71 | 54512.99 | 0.27985101 | 3.057604611 | 0.553073124 | 0.485381325  |
| 4  | Glucose-1-Phosphate                                             | 11033.9012 | 30700.405 | 8860.87  | 30776.02 | 0.20355587 | 2.782370811 | 0.691316359 | 0.444415009  |
| 5  | Oxaloacetate                                                    | 18426.6949 | 21269.656 | 9829.662 | 8118.1   | 0.61134956 | 1.154284922 | 0.213710393 | 0.062313022  |
| 6  | Dihydroxyacetone-Phosphate_/                                    | 15451.5741 | 25399.01  | 14376.32 | 17343.5  | 0.33398996 | 1.643781419 | 0.476266594 | 0.215844067  |
| 7  | <b><u>(vii) Synthesis and degradation of ketone bodies:</u></b> |            |           |          |          |            |             |             |              |
| 8  | Acetoacetyl-CoA                                                 | 57.9540688 | 194.53479 | 51.26006 | 55.30617 | 0.00226476 | 3.356706408 | 2.644978152 | 0.525913358  |
| 9  | Acetyl-CoA                                                      | 172.896092 | 1185.2564 | 125.2373 | 1667.867 | 0.2125213  | 6.855310625 | 0.672597539 | 0.836027138  |
| 10 | 3-Hydroxybutyrate                                               | 52478.5453 | 38100.943 | 17519.82 | 19244.33 | 0.2313414  | 0.726028956 | 0.63574664  | -0.139046058 |
| 11 | Acetoacetate                                                    | 35661.8554 | 46962.449 | 24244.05 | 43529.17 | 0.61905889 | 1.316881829 | 0.208268036 | 0.119546805  |
| 12 | <b><u>(viii) Purine metabolism:</u></b>                         |            |           |          |          |            |             |             |              |
| 13 | Guanosine_Diphosphate_(GDP)                                     | 812.978555 | 2353.2032 | 232.6867 | 2711.925 | 0.24119865 | 2.894545266 | 0.617625134 | 0.461580346  |
| 14 | Xanthine                                                        | 310914.762 | 490957.82 | 230603   | 529211.6 | 0.50023423 | 1.579075295 | 0.300826595 | 0.198402839  |
| 15 | Ribose-5-Phosphate_/Ribulose                                    | 36395.0716 | 37586.29  | 32729.75 | 25183.51 | 0.94700322 | 1.03273021  | 0.023648542 | 0.013986881  |
| 16 | Glutamine                                                       | 167078.921 | 193131.89 | 72189.35 | 75571.31 | 0.57567025 | 1.155932107 | 0.239826216 | 0.062932327  |
| 17 | Adenosine_Diphosphate_(ADP)                                     | 60498.3794 | 142534.55 | 34710.13 | 162248.1 | 0.29975176 | 2.356006056 | 0.523238257 | 0.372176402  |
| 18 | Adenosine_Monophosphate_(AI                                     | 42628.2603 | 62445.334 | 30563.7  | 52108.66 | 0.47460324 | 1.464881119 | 0.323669301 | 0.165802381  |
| 19 | Adenosine_Triphosphate_(ATP)                                    | 8676.64023 | 4760.3464 | 7649.34  | 5500.175 | 0.34875844 | 0.548639367 | 0.45747528  | -0.260713033 |
| 20 | Xanthosine                                                      | 13406.5765 | 3023.0438 | 22048.05 | 4861.308 | 0.28660785 | 0.225489619 | 0.542711917 | -0.646873447 |
| 21 | Hypoxanthine                                                    | 261533.893 | 302674.48 | 255649.9 | 383270   | 0.84270773 | 1.157304977 | 0.074323024 | 0.063447821  |
| 22 | Inosine                                                         | 1999919.46 | 2029097.9 | 1711555  | 2028036  | 0.98025694 | 1.014589827 | 0.008660073 | 0.006290504  |
| 23 | Guanosine_Triphosphate_(GTP)                                    | 126.198959 | 174.28923 | 147.4333 | 177.5802 | 0.64150051 | 1.381067102 | 0.192802994 | 0.14021478   |
| 24 | <b><u>(ix) Propanoate metabolism:</u></b>                       |            |           |          |          |            |             |             |              |
| 25 | Methylmalonyl-CoA                                               | 3524.80607 | 3508.0416 | 3041.222 | 2588.283 | 0.9923229  | 0.995243871 | 0.003346984 | -0.002070488 |
| 26 | Succinate                                                       | 331334.172 | 345653.73 | 145225.6 | 209980.9 | 0.90058147 | 1.043217873 | 0.045476994 | 0.018375019  |
| 27 | Propanoyl-CoA                                                   | 85.9984913 | 75.723249 | 78.23899 | 106.1157 | 0.86182358 | 0.880518336 | 0.064581626 | -0.055261596 |
| 28 | Acetyl-CoA                                                      | 172.896092 | 1185.2564 | 125.2373 | 1667.867 | 0.2125213  | 6.855310625 | 0.672597539 | 0.836027138  |
| 29 | Malonyl-CoA                                                     | 513.939349 | 391.77518 | 419.2507 | 460.1548 | 0.65920326 | 0.762298481 | 0.180980657 | -0.117874946 |
| 30 | Succinyl-CoA                                                    | 116.168071 | 51.40781  | 118.6868 | 41.92338 | 0.24033978 | 0.442529597 | 0.619174346 | -0.354057678 |
| 31 | Acetoacetyl-CoA                                                 | 57.9540688 | 194.53479 | 51.26006 | 55.30617 | 0.00226476 | 3.356706408 | 2.644978152 | 0.525913358  |
| 32 | <b><u>(x) Arginine biosynthesis:</u></b>                        |            |           |          |          |            |             |             |              |
| 33 | Glutamate                                                       | 359805.802 | 416065.25 | 151673.5 | 111283.3 | 0.49544774 | 1.156360586 | 0.30500215  | 0.063093281  |
| 34 | Aspartate                                                       | 256854.861 | 254868.66 | 171377.9 | 63477.25 | 0.97941746 | 0.992267227 | 0.009032156 | -0.003371352 |
| 35 | Glutamine                                                       | 167078.921 | 193131.89 | 72189.35 | 75571.31 | 0.57567025 | 1.155932107 | 0.239826216 | 0.062932327  |
| 36 | alpha-Ketoglutarate_(a-KG)                                      | 26217.7586 | 43007.129 | 18629.23 | 40418.29 | 0.41689392 | 1.640381599 | 0.379974434 | 0.214944889  |
| 37 | Fumarate                                                        | 40372.5888 | 33057.552 | 31940.29 | 48327.33 | 0.77935033 | 0.818811792 | 0.108267275 | -0.086815911 |
| 38 | <b><u>(xi) Aminoacyl-tRNA biosynthesis:</u></b>                 |            |           |          |          |            |             |             |              |
| 39 | Phenylalanine                                                   | 8962.16318 | 5173.4382 | 6599.869 | 1908.18  | 0.20902904 | 0.577253291 | 0.679793367 | -0.238633583 |
| 40 | Glutamine                                                       | 167078.921 | 193131.89 | 72189.35 | 75571.31 | 0.57567025 | 1.155932107 | 0.239826216 | 0.062932327  |
| 41 | Aspartate                                                       | 256854.861 | 254868.66 | 171377.9 | 63477.25 | 0.97941746 | 0.992267227 | 0.009032156 | -0.003371352 |
| 42 | Serine                                                          | 40596.6326 | 31764.305 | 22566.05 | 10833.07 | 0.41510451 | 0.782436934 | 0.381842546 | -0.106550657 |
| 43 | Methionine                                                      | 5458.49439 | 3556.2931 | 4447.236 | 4680.917 | 0.50993013 | 0.651515387 | 0.292489322 | -0.186075323 |
| 44 | Threonine                                                       | 81129.6698 | 90634.611 | 49818.2  | 48821.23 | 0.75729209 | 1.117157395 | 0.120736582 | 0.048114365  |
| 45 | Tryptophan                                                      | 227.294652 | 53.8864   | 348.2006 | 28.63966 | 0.25042208 | 0.237077289 | 0.601327386 | -0.625110048 |
| 46 | Tyrosine                                                        | 2963.90306 | 5174.027  | 3373.105 | 6668.386 | 0.52025535 | 1.745680247 | 0.283783448 | 0.241964698  |
| 47 | Glutamate                                                       | 359805.802 | 416065.25 | 151673.5 | 111283.3 | 0.49544774 | 1.156360586 | 0.30500215  | 0.063093281  |
| 48 | <b><u>(xii) D-Glutamine and D-glutamate metabolism:</u></b>     |            |           |          |          |            |             |             |              |
| 49 | Glutamate                                                       | 359805.802 | 416065.25 | 151673.5 | 111283.3 | 0.49544774 | 1.156360586 | 0.30500215  | 0.063093281  |
| 50 | Glutamine                                                       | 167078.921 | 193131.89 | 72189.35 | 75571.31 | 0.57567025 | 1.155932107 | 0.239826216 | 0.062932327  |
| 51 | alpha-Ketoglutarate_(a-KG)                                      | 26217.7586 | 43007.129 | 18629.23 | 40418.29 | 0.41689392 | 1.640381599 | 0.379974434 | 0.214944889  |
| 52 | <b><u>(xiii) beta-Alanine metabolism:</u></b>                   |            |           |          |          |            |             |             |              |
| 53 | Propanoyl-CoA                                                   | 85.9984913 | 75.723249 | 78.23899 | 106.1157 | 0.86182358 | 0.880518336 | 0.064581626 | -0.055261596 |
| 54 | Malonyl-CoA                                                     | 513.939349 | 391.77518 | 419.2507 | 460.1548 | 0.65920326 | 0.762298481 | 0.180980657 | -0.117874946 |
| 55 | Aspartate                                                       | 256854.861 | 254868.66 | 171377.9 | 63477.25 | 0.97941746 | 0.992267227 | 0.009032156 | -0.003371352 |
| 56 | Carnosine                                                       | 128592.704 | 192689.24 | 90681.6  | 153165.7 | 0.43371826 | 1.498446103 | 0.362792295 | 0.175641127  |
| 57 | Acetyl-CoA                                                      | 172.896092 | 1185.2564 | 125.2373 | 1667.867 | 0.2125213  | 6.855310625 | 0.672597539 | 0.836027138  |
| 58 | <b><u>(xiv) Glutathione metabolism:</u></b>                     |            |           |          |          |            |             |             |              |
| 59 | NADP+_Oxidized                                                  | 2735.23685 | 6331.141  | 2876.165 | 7867.272 | 0.36091768 | 2.314659154 | 0.442591846 | 0.364487048  |
| 60 | Glutathione_oxidized_(GSSG)                                     | 604964.474 | 628066.86 | 510864.9 | 494538   | 0.9410648  | 1.038187996 | 0.026380469 | 0.016276003  |
|    | NADPH_Reduced                                                   | 836.327352 | 1762.1595 | 488.1627 | 887.6471 | 0.06795902 | 2.107021262 | 1.167752902 | 0.323668918  |
